# Supplementary material for: Peripherally Inserted Central Venous Catheter (PICC) Related Bloodstream Infection in Cancer Patients Treated with Chemotherapy Compared with Noncancer Patients: A Propensity-Score-Matched Analysis
Source: MDPI journal article supplement (doi:10.3390/cancers15123253), 2023-06-20
Supplement: s1 [file s1]

Supplementary materials

# Peripherally Inserted Central Venous Catheter (PICC) Related Bloodstream Infection in Cancer Patients Treated with Chemotherapy Compared with Noncancer Patients: A Propensity-Score-Matched Analysis

Romaric Larcher, Koko Barrigah-Benissan, Jerome Ory, Claire Simon, Jean-Paul Beregi, Jean-Philippe Lavigne and Albert Sotto

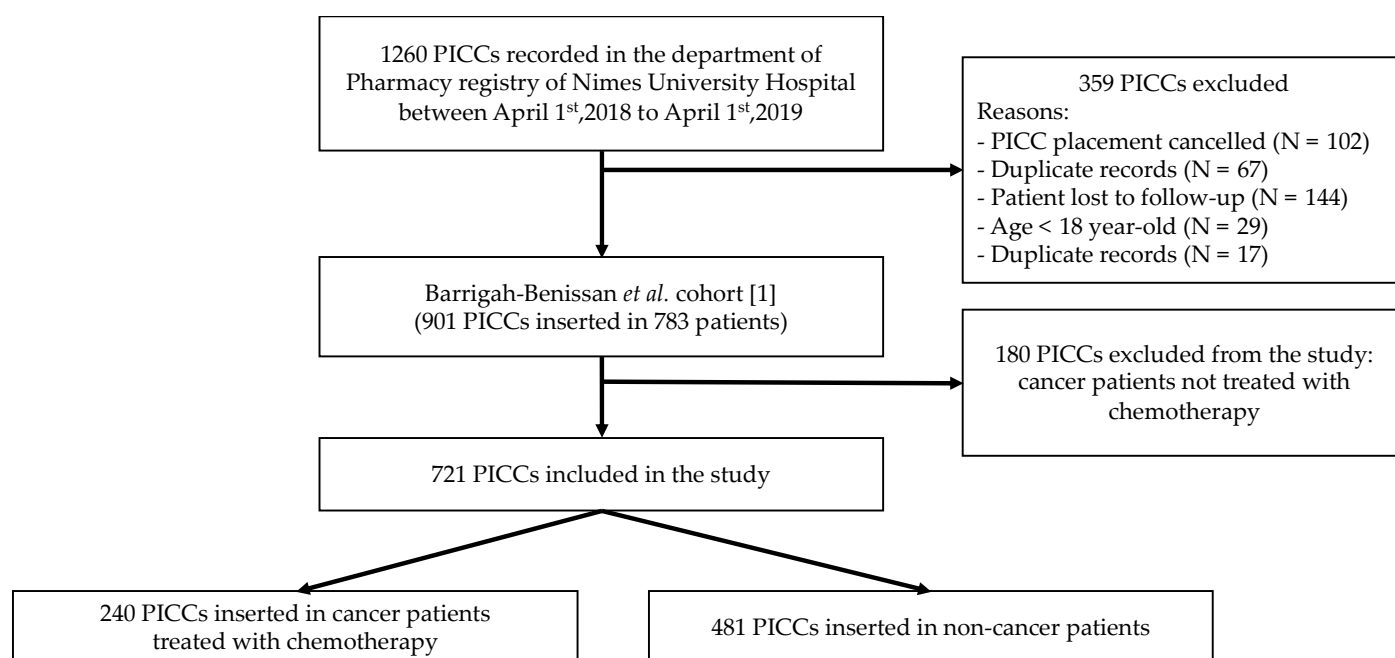

**Figure S1.** Flow chart of the study population and peripherally inserted central catheters (PICC).

**Table S1.** Bacterial species involved in peripherally inserted central catheter (PICC) colonization and non-bacteremia PICC-related infection.

| Bacterial species                  | Overall <sup>1</sup> | Cancer patients <sup>1</sup> | Non-cancer patients <sup>1</sup> |
|------------------------------------|----------------------|------------------------------|----------------------------------|
| PICC colonization                  |                      |                              |                                  |
| Gram-positive bacteria             | 32 (97%)             | 13 (87%)                     | 18 (100%)                        |
| <i>Staphylococcus epidermidis</i>  | 21 (64%)             | 10 (67%)                     | 11 (61%)                         |
| <i>Staphylococcus haemolyticus</i> | 5 (15%)              | 1 (6.7%)                     | 4 (22%)                          |
| <i>Staphylococcus capitis</i>      | 2 (6.1%)             | 1 (6.7%)                     | 1 (5.6%)                         |
| <i>Staphylococcus hominis</i>      | 2 (6.1%)             | 0 (0%)                       | 2 (11%)                          |
| <i>Staphylococcus warnerii</i>     | 1 (3%)               | 0 (0%)                       | 1 (5.6%)                         |
| <i>Corynebacterium</i> sp.         | 1 (3%)               | 1 (6.7%)                     | 0 (0%)                           |
| Gram-negative bacteria             | 3 (9.1%)             | 2 (13%)                      | 1 (5.6%)                         |
| <i>Escherichia coli</i>            | 2 (6.1%)             | 2 (13%)                      | 0 (0%)                           |
| <i>Morganella morganii</i>         | 1 (3%)               | 0 (0%)                       | 1 (5.6%)                         |
| NB-PICCRI                          |                      |                              |                                  |
| Gram-negative bacteria             | 4 (0.6%)             | 2 (0.8%)                     | 2 (0.4%)                         |
| <i>Pseudomonas aeruginosa</i>      | 2 (0.3%)             | 1 (0.4%)                     | 1 (0.2%)                         |
| <i>Pseudomonas putida</i>          | 1 (0.1%)             | 0 (0%)                       | 1 (0.2%)                         |
| <i>Serratia marcescens</i>         | 1 (0.1%)             | 1 (0.4%)                     | 0 (0%)                           |
| Gram-positive bacteria             | 3 (0.4%)             | 2 (0.8%)                     | 1 (0.2%)                         |
| <i>Staphylococcus aureus</i>       | 3 (0.4%)             | 2 (0.8%)                     | 1 (0.2%)                         |
| Fungi                              | 4 (0.6%)             | 1 (0.4%)                     | 3 (0.6%)                         |
| <i>Candida albicans</i>            | 3 (0.4%)             | 0 (0%)                       | 3 (0.6%)                         |
| <i>Candida parapsilosis</i>        | 1 (0.1%)             | 1 (0.4%)                     | 0 (0%)                           |

<sup>1</sup> N (%); <sup>2</sup> NB-PICCRI: non-bacteremia PICC related infection
